# Supplementary material for: TIGIT+Tfh show poor B-helper function and negatively correlate with SARS-CoV-2 antibody titre
Source: Front Immunol. 2024 May 29;15:1395684. doi: 10.3389/fimmu.2024.1395684 (PMC11167088; doi:10.3389/fimmu.2024.1395684)
Supplement: Supplementary file 2 [file Table_2.xlsx]

## Sheet: Aurora panel 1
Target	Conjugate	Clone	Supplier	Catalogue	ul/tube
CCR2	APC	K036C2	Biolegend	357207	3
incubate 5 min, 37C
CCR5	BUV563	2D7/CCR5	BD	741401	1
incubate 5 min, 37C
CCR7	BV421	G043H7	Biolegend	353208	3
incubate 5 min, 37C
CD45RA	BUV395	HI100	BD	740298	0.5
PD-1	BUV615	EH12.1	BD	612991	3
CD16	BUV661	B73.1	BD	741693	2
CD56	BUV737	NCAM16.2	BD	612766	3
CD8	BUV805	SK1	BD	612890	0.5
CD28	eFluor450	CD28.2	Thermo Fisher	48-0289-42	5
CD3	BV510	SK7	Biolegend	344828	3
ICOS	biotin	ISA-3	Thermo Fisher	13-9948-82	3
CCR6	BV711	11A9	BD	563923	3
CXCR5	BV750	J252D4	Biolegend	356942	3
CD4	BV785	RPA-T4	Biolegend	300554	3
CD103	BB515	Ber-ACT8	BD	564578	3
CD14	Spark Blue 550	63D3	Biolegend	367148	2
CD62L	PerCP-Cy5.5	DREG-56	Biolegend	304824	3
OX40	PE	Ber-ACT35 (ACT35)	Biolegend	350004	3
CCR4	PE/Dazzle594	L291H4	Biolegend	359420	0.5
CXCR3	PE-Cy5	1C6/CXCR3	BD	551128	3
CD25	PE-AlexaFluor700	CD25-3G10	Thermo Fisher	MHCD2524	2
TIGIT	PE-Cy7	A15153G	Biolegend	372714	3
CD19	AlexaFluor647	SJ25C1	Biolegend	363040	2
CD127	APC-R700	HIL-7R-M21	BD	565185	3
HLA-DR	APC/eFluor780	LN3	Thermo Fisher	47-9956-42	3
CD38	APC/Fire810	HIT2	Biolegend	303550	3
incubate 15 min, 37C
wash in P2 (5 min 400g)
streptavidin	BV650		Biolegend	405232	2
incubate 10 min, 4C
wash in PBS (5 min 400g)
Zombie UV			Biolegend	423108	1/2000
incubate 10 min, 4C
wash twice in P2 (5 min 400g)

## Sheet: Aurora panel 2
Target	Conjugate	Clone	Supplier	Catalogue	ul/tube
CCR7	APC-R700	3D12	BD	565867	3
incubate 5 min, 37C
CD45RA	BV750	HI100	Biolegend	304166	0.1
CD21	BUV496	B-ly4	BD	750614	3
CD5	BUV395	UCHT2	BD	740284	3
PD-1	BUV615	EH12.1	BD	612991	3
CD11c	BUV661	B-ly6	BD	612967	3
CD95	BUV737	DX2	BD	612790	3
CD8	BUV805	SK1	BD	612890	0.5
IgD	BV480	IA6-2	BD	566138	3
CD3	BV510	SK7	Biolegend	344828	3
IgM	BV570	MHM-88	Biolegend	314517	1
CD27	BV605	O323	Biolegend	302830	3
ICOS	biotin	ISA-3	Thermo Fisher	13-9948-82	3
CD86	BV711	IT2.2	Biolegend	305440	3
CD4	BV785	RPA-T4	Biolegend	300554	3
CD19	AlexaFluor488	SJ25C1	Biolegend	363038	3
CD14	Spark Blue 550	63D3	Biolegend	367148	2
CD24	PerCP-Cy5.5	ML5	Biolegend	311116	3
CD80	PE	L307.4	BD	557227	3
CXCR3	PE-Cy7	G025H7	Biolegend	353720	3
ICOSL	AlexaFluor647	2D3	Biolegend	309416	5
CD85j	APC/Fire750	GHI/75	Biolegend	333718	5
CD38	APC/Fire810	HIT2	Biolegend	303550	3
incubate 15 min, 37C
wash in P2 (5 min 400g)
streptavidin	BV650		Biolegend	405232	2
incubate 10 min, 4C
wash in PBS (5 min 400g)
Zombie UV			Biolegend	423108	1/2000
incubate 10 min, 4C
wash in PBS (5 min 400g)
fix using Foxp3 / Transcription Factor Staining Buffer Set (Thermo Fisher, 00-5523-00)
wash twice in permeabilization buffer (5 min 400g)
Tbet	BV421	4B10	Biolegend	644816	4
Ki67	eFluor450	20Raj1	Thermo Fisher	48-5699-42	3
CTLA-4	APC	BNI3	Biolegend	369612	5
Foxp3	PE-Cy5	PCH101	Thermo Fisher	15-4776-42	2
incubate 30 min, 4C
wash twice in permeabilization buffer (5 min 400g)

## Sheet: COVID cytokine panel
Target	Conjugate	Clone	Supplier	Catalogue	ul/tube
CD45RA	BV510	HI100	Biolegend	304142	2
CD20	PE-CF594	2H7	BD	562295	1
incubate 15 min, 37C
wash in PBS (5 min 400g)
Viability Dye eFuor780			Thermo Fisher	65-0865-14	1/16000
incubate 10 min, 4C
wash in PBS (5 min 400g)
fix using Foxp3 / Transcription Factor Staining Buffer Set (Thermo Fisher, 00-5523-00)
wash twice in permeabilization buffer (5 min 400g)
CD3	BUV395	SK7	BD	564001	3
CD4	PerCP-Cy5.5	RPA-T4	BD	560650	5
CD8	PE-CF594	RPA-T8	BD	562282	0.5
CTLA-4	PE	BNI3	BD	555853	3
Foxp3	eFluor450	236A/E7	Thermo Fisher	48-4777-42	3
IFN-γ	BV650	4S.B3	BD	563416	2
Granzyme B	FITC	QA16A02	Biolegend	372206	5
IL-17A	BV785	BL168	Biolegend	512338	3
IL-4	PE-Cy7	8D4-8	Thermo Fisher	25-7049-82	2
GM-CSF	APC	BVD2-21C11	Biolegend	502310	3
TNFalpha	AlexaFluor700	MAb11	Biolegend	502928	3
incubate 30 min, 4C
wash twice in permeabilization buffer (5 min 400g)

## Sheet: Coculture sorting panels
A - TIGIT Tfh cocultures
Target	Conjugate	Clone	Supplier	Catalogue	Dilution
Viability Dye eFuor780			Thermo Fisher	65-0865-14	1/16000
incubate 10 min, 4C
wash in P2 (5 min 400g)
CD3	PE-CF594	UCHT1	BD	562280	1/200
IgD	PerCP-Cy5.5	IA6-2	Biolegend	348208	1/50
CD27	PE-Cy7	M-T271	Biolegend	356412	1/50
CXCR5	AlexaFluor488	RF8B2	BD	558112	1/50
CD45RA	BV510	HI100	Biolegend	304142	1/100
CD4	AlexaFluor700	SK3	Biolegend	344622	1/50
CD19	BV786	SJ25C1	BD	563325	1/50
TIGIT	APC	MBSA43	Thermo Fisher	17-9500-42	1/50
incubate 30 min, 4C
wash in P2 (5 min 400g)
B - TIGIT blockade coculture
Target	Conjugate	Clone	Supplier	Catalogue	Dilution
Viability Dye eFuor780			Thermo Fisher	65-0865-14	1/16000
incubate 10 min, 4C
wash in P2 (5 min 400g)
CD3	PE-CF594	UCHT1	BD	562280	1/200
IgD	PerCP-Cy5.5	IA6-2	Biolegend	348208	1/50
CD27	PE-Cy7	M-T271	Biolegend	356412	1/50
CXCR5	AlexaFluor488	RF8B2	BD	558112	1/50
CD45RA	BV510	HI100	Biolegend	304142	1/100
CD4	AlexaFluor700	SK3	Biolegend	344622	1/50
CD19	BV786	SJ25C1	BD	563325	1/50
incubate 30 min, 4C
wash in P2 (5 min 400g)
C - cytokine coculture
Target	Conjugate	Clone	Supplier	Catalogue	Dilution
Viability Dye eFuor780			Thermo Fisher	65-0865-14	1/16000
incubate 10 min, 4C
wash in P2 (5 min 400g)
CD3	BUV395	SK7	BD	564001	1/50
IgD	PerCP-Cy5.5	IA6-2	Biolegend	348208	1/50
CD27	BUV737	L128	BD	612829	1/50
CXCR5	AlexaFluor488	RF8B2	BD	558112	1/20
CD45RA	BV510	HI100	Biolegend	304142	1/100
CD4	AlexaFluor700	SK3	Biolegend	344622	1/50
CD19	BV786	SJ25C1	BD	563325	1/50
TIGIT	eFluor450	MBSA43	Thermo Fisher	48-9500-42	1/25
incubate 30 min, 4C
wash in P2 (5 min 400g)

## Sheet: Coculture B cell panel
Target	Conjugate	Clone	Supplier	Catalogue	Dilution
Viability Dye eFuor780			Thermo Fisher	65-0865-14	1/16000
incubate 10 min, 4C
wash in P2 (5 min 400g)
CD27	PE-Cy7	M-T271	Biolegend	356412	1/50
CD38	PE-CF594	HIT2	BD	562288	1/100
CD4	AlexaFluor700	SK3	Biolegend	344622	1/50
CD3	BUV395	SK7	BD	564001	1/50
CD19	BV786	SJ25C1	BD	563325	1/50
TIGIT	APC	MBSA43	Thermo Fisher	17-9500-42	1/50
CXCR5	AlexaFluor488	RF8B2	BD	558112	1/20
IgD	PerCP-Cy5.5	IA6-2	Biolegend	348208	1/50
incubate 30 min, 4C
wash in P2 (5 min 400g)

## Sheet: Coculture cytokine panels
Target	Conjugate	Clone	Supplier	Catalogue	Dilution
Viability Dye eFuor780			Thermo Fisher	65-0865-14	1/16000
incubate 10 min, 4C
wash in P2 (5 min 400g)
CD19	BV786	SJ25C1	BD	563325	1/50
CXCR5	AlexaFluor488	RF8B2	BD	558112	1/20
TIGIT	eFluor450	MBSA43	Thermo Fisher	48-9500-42	1/25
TGFb1	PE	TW4-9E7	BD	562339	1/25
incubate 30 min, 4C
wash in PBS (5 min 400g)
fix using Foxp3 / Transcription Factor Staining Buffer Set (Thermo Fisher, 00-5523-00)
wash twice in permeabilization buffer (5 min 400g)
CD4	AlexaFluor700	SK3	Biolegend	344622	1/200
CD3	BUV395	SK7	BD	564001	1/200
IL-2	BV711	5344.11	BD	563946	1/100
IL-4	PE/Dazzle594	MP4-25D2	Biolegend	500832	1/100
IL-10	PE-Cy7	JES3-9D7	Biolegend	501420	1/50
IL-13	PerCP-Cy5.5	JES10-5A2	Biolegend	501911	1/50
IL-17A	BV605	BL168	Biolegend	512326	1/200
IL-21	eFluor660	ebio3A3-N2	Thermo Fisher	50-7219-42	1/50
IFN-y	BV650	4S.B3	BD	563416	1/100
incubate 16 h, 4C
wash twice in permeabilization buffer (5 min 400g)

## Sheet: Control staining panels
A - surface CD40L
Target	Conjugate	Clone	Supplier	Catalogue	Dilution
CD45RA	PerCP-Cy5.5	HI100	Thermo Fisher	45-0458-42	1/100
CD25	BV650	M-A251	BD	563719	1/50
CXCR5	AlexaFluor488	RF8B2	BD	558112	1/20
TIGIT	eFluor450	MBSA43	Thermo Fisher	48-9500-42	1/25
CD40L	PE-CF594	TRAP1	BD	563589	1/20
incubate 1 h, 4C
wash in PBS (5 min 400g)
Viability Dye eFuor780			Thermo Fisher	65-0865-14	1/16000
incubate 10 min, 4C
wash in PBS (5 min 400g)
fix using Foxp3 / Transcription Factor Staining Buffer Set (Thermo Fisher, 00-5523-00)
wash twice in permeabilization buffer (5 min 400g)
CD3	BUV395	SK7	BD	564001	1/50
CD4	PE-Cy7	SK3	BD	557852	1/50
Foxp3	PE	236A/E7	Thermo Fisher	12-4777-42	1/20
Ki67	AlexaFluor647	B56	BD	558615	1/20
incubate 16 h, 4C
wash twice in permeabilization buffer (5 min 400g)
B - intracellular CD40L
Target	Conjugate	Clone	Supplier	Catalogue	Dilution
CD45RA	PerCP-Cy5.5	HI100	Thermo Fisher	45-0458-42	1/100
CD25	BV650	M-A251	BD	563719	1/50
CXCR5	AlexaFluor488	RF8B2	BD	558112	1/20
TIGIT	eFluor450	MBSA43	Thermo Fisher	48-9500-42	1/25
incubate 1 h, 4C
wash in PBS (5 min 400g)
Viability Dye eFuor780			Thermo Fisher	65-0865-14	1/16000
incubate 10 min, 4C
wash in PBS (5 min 400g)
fix using Foxp3 / Transcription Factor Staining Buffer Set (Thermo Fisher, 00-5523-00)
wash twice in permeabilization buffer (5 min 400g)
CD3	BUV395	SK7	BD	564001	1/50
CD4	PE-Cy7	SK3	BD	557852	1/50
Foxp3	PE	236A/E7	Thermo Fisher	12-4777-42	1/20
Ki67	AF647	B56	BD	558615	1/20
CD40L	PE-CF594	TRAP1	BD	563589	1/20
incubate 16 h, 4C
wash twice in permeabilization buffer (5 min 400g)
C - TIGIT Tfh
Target	Conjugate	Clone	Supplier	Catalogue	Dilution
CCR7	BV605	G043H7	Biolegend	353224	1/25
incubate 30 min, 37C
CD3	BUV395	SK7	BD	564001	1/50
CD4	PE-Cy7	SK3	BD	557852	1/50
CD45RA	PerCP-Cy5.5	HI100	Thermo Fisher	45-0458-42	1/100
CD127	BV711	HIL-7R-M21	BD	563165	1/50
CD25	BV650	M-A251	BD	563719	1/50
CXCR5	AlexaFluor488	RF8B2	BD	558112	1/20
TIGIT	eFluor450	MBSA43	Thermo Fisher	48-9500-42	1/25
CXCR3	BV785	G025H7	Biolegend	353738	1/50
CCR6	APC-R700	11A9	BD	565173	1/50
CD161	PE/Dazzle594	HP-3G10	Biolegend	339940	1/25
incubate 1 h, 4C
wash in PBS (5 min 400g)
Viability Dye eFuor780			Thermo Fisher	65-0865-14	1/16000
incubate 10 min, 4C
wash in PBS (5 min 400g)
fix using Foxp3 / Transcription Factor Staining Buffer Set (Thermo Fisher, 00-5523-00)
wash twice in permeabilization buffer (5 min 400g)
Foxp3	PE	236A/E7	Thermo Fisher	12-4777-42	1/20
Ki67	AF647	B56	BD	558615	1/20
incubate 16 h, 4C
wash twice in permeabilization buffer (5 min 400g)
